# Supplementary material
Source: PubMed Central journal article supplement (PMC4751848)
Supplement: AEM.02852-15_zam999116935so1.pdf [file AEM.02852-15_zam999116935so1.pdf]

## 1 **Supplementary figure legends**

2 **Fig. S1** Transmission electron microscopy of OM43 cells from the Red Sea growing at 28 °C in  
3 low-nutrient media. Bar size: 200 nm.

4 **Fig. S2** Growth measurements at 28 °C of the Red Sea isolate MBRS-H7 in the presence  
5 (squares) or absence (circles) of 100 µM methanol.

6 **Fig. S3** Maximum-likelihood (n=1000 bootstraps) phylogenetic comparison of the 16S rRNA  
7 gene versus the 23S rRNA gene classification of main methylotrophic bacterial groups. Isolates  
8 MBRS-F5 and MBRS-G12 which are almost identical to MBRS-H7 are also shown. Red: H-RS;  
9 Bold black: Freshwater *Ca. Methylopumilus* strains; Green: other *Methylophylaceae*.

10 **Fig. S4** Maximum-likelihood (n=1000 bootstraps) phylogeny of xanthorhodopsin proteins based  
11 on the classification by Vollmers *et al.*, 2013, including members of the OM43 clade and *Ca.*  
12 *Methylopumilus* strains. The relationship with other divergent rhodopsin-like proteins is also  
13 shown. Isolates MBRS-F5 and MBRS-G12 which are virtually identical to MBRS-H7 are also  
14 shown.

15 **Fig. S5** Fragment recruitment analysis comparing HTCC2181, KB13 and MBRS-H7 against  
16 metagenomes from the Red Sea, East Tropical South Pacific (ETSP), Hawaii Ocean Time Series  
17 (HOT), and Bermuda Atlantic Time Series (BATS), at different seasons and depths.

18

19

## References

**Vollmers J, Voget S, Dietrich S, Gollnow K, Smits M, Meyer K, Brinkhoff T, Simon M, Daniel R.** 2013. Poles apart: Arctic and Antarctic Octadecabacter strains share high genome plasticity and a new type of xanthorhodopsin. PLoS One **8**:e63422.

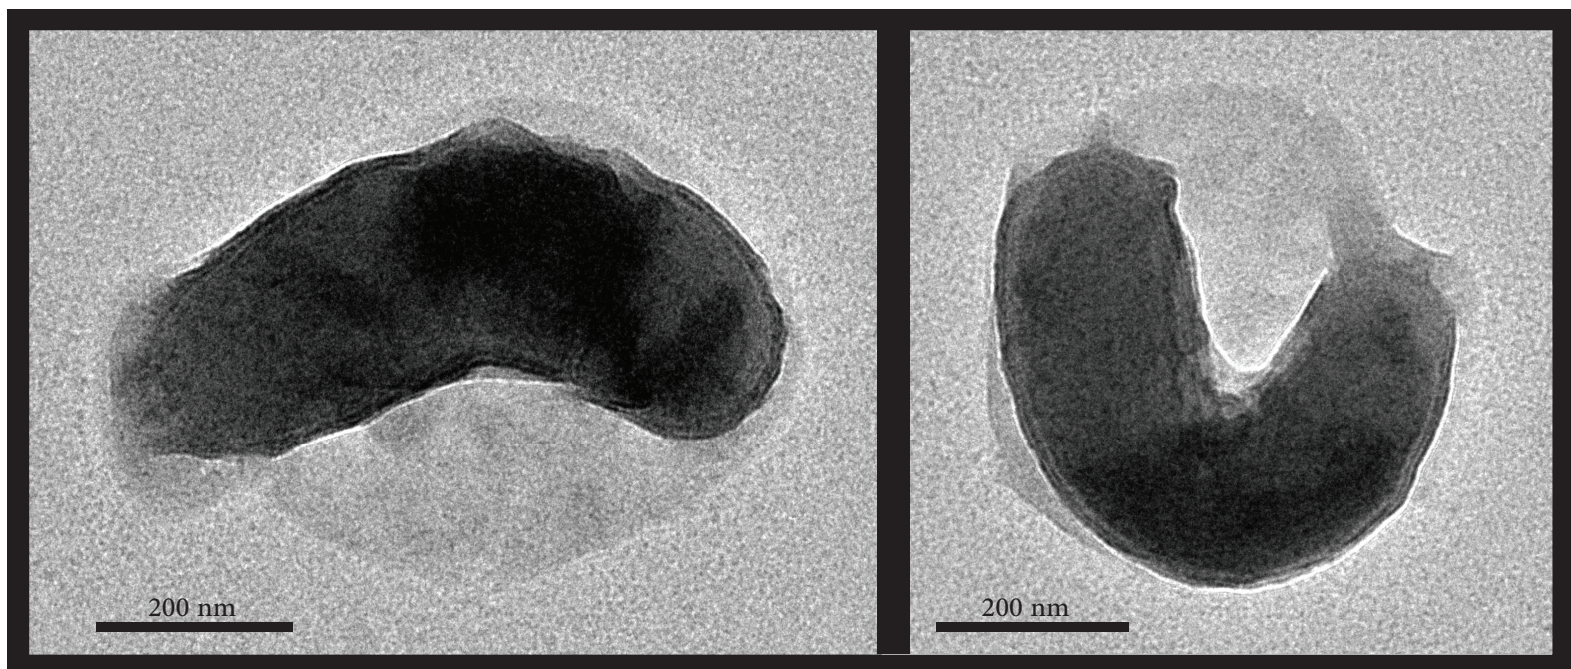

**Figure S1.**

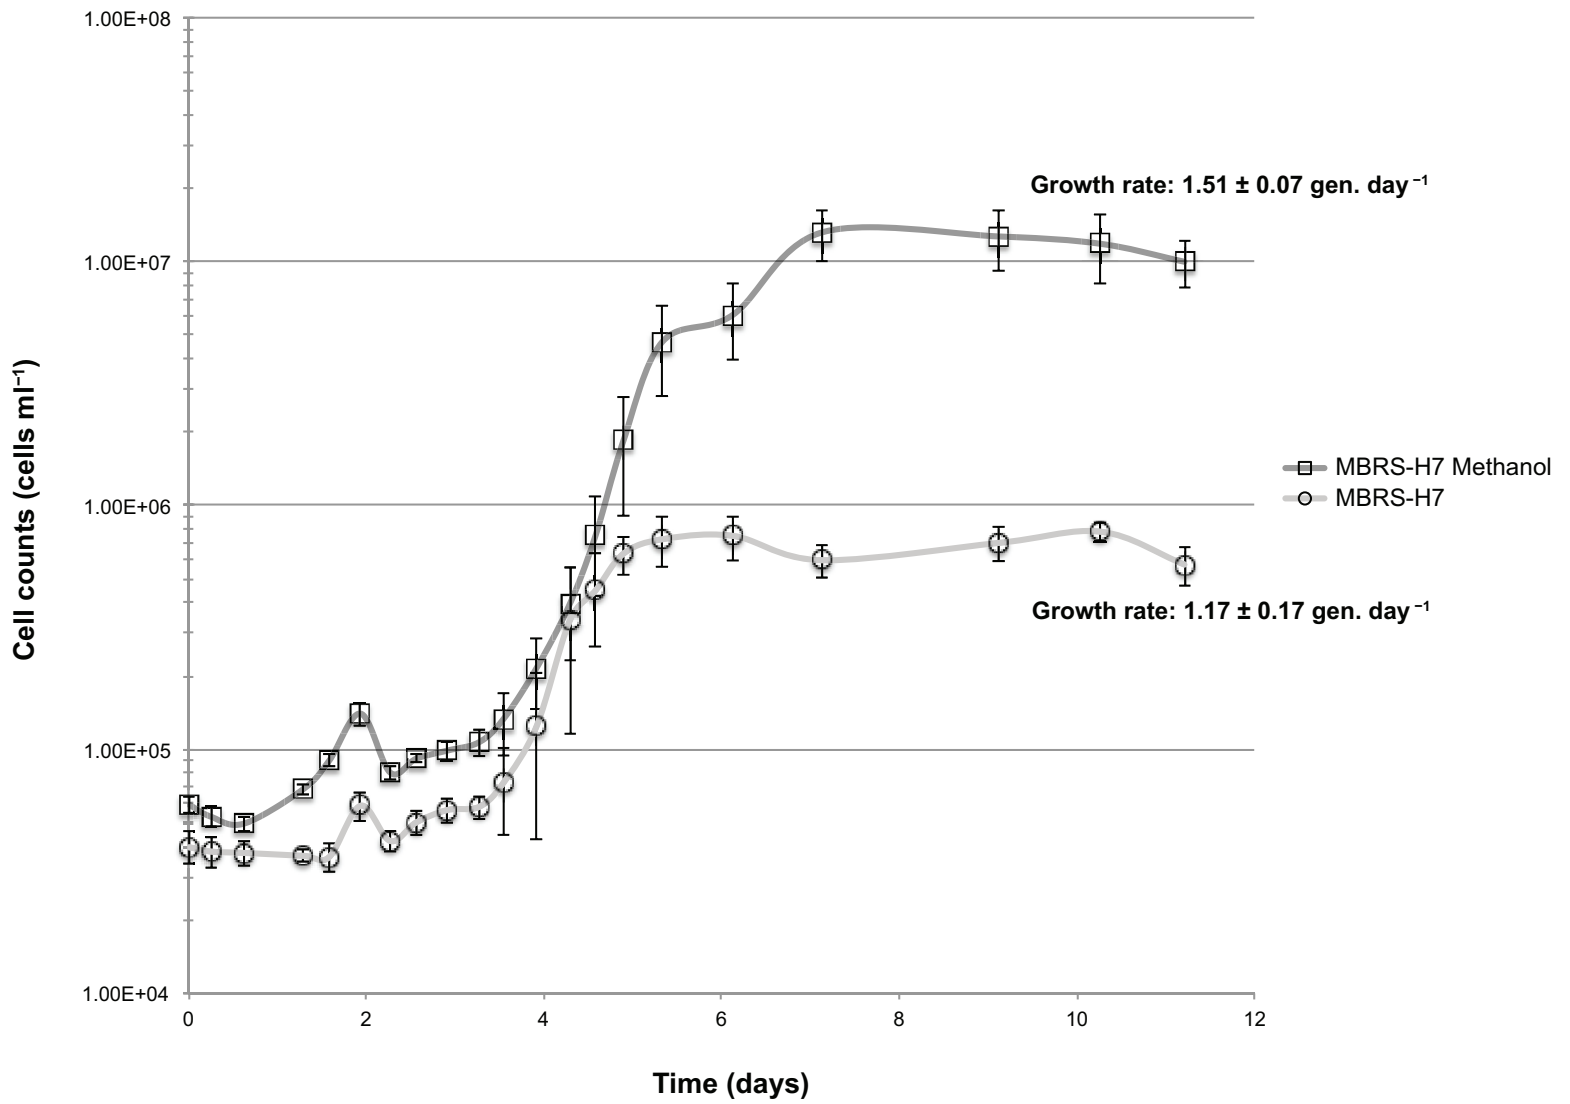

Figure S2.

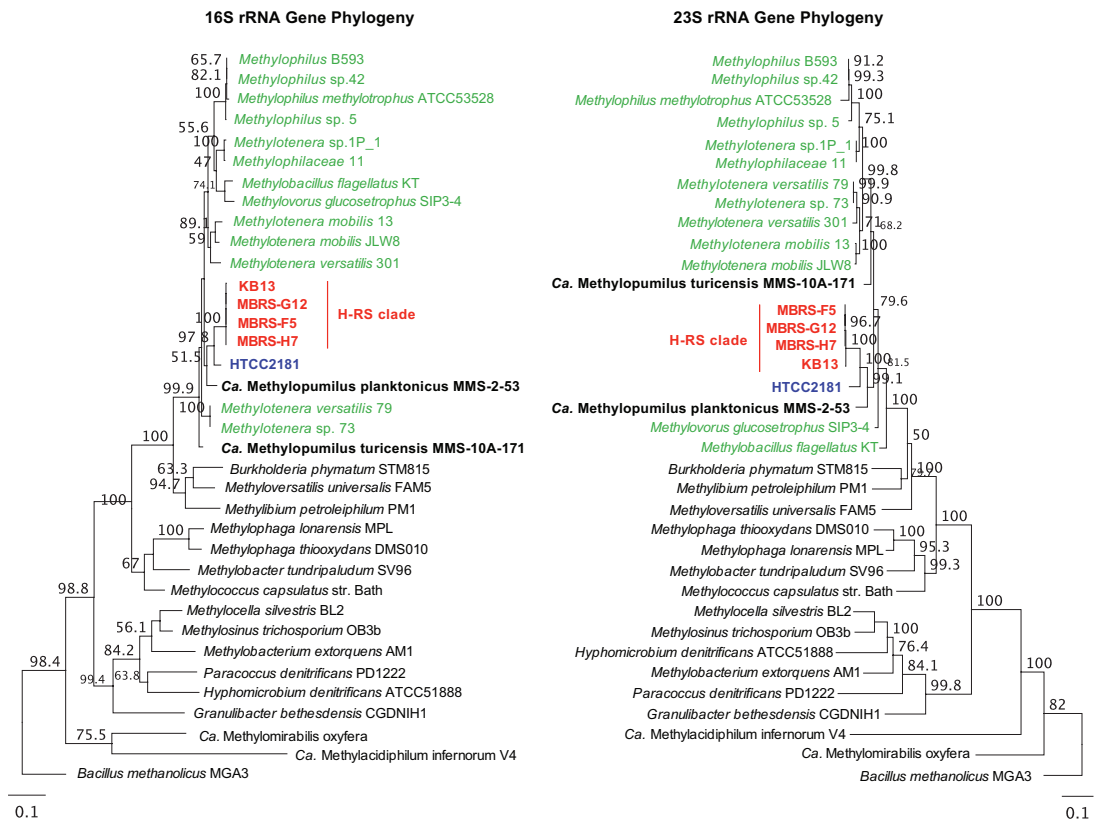

Figure S3

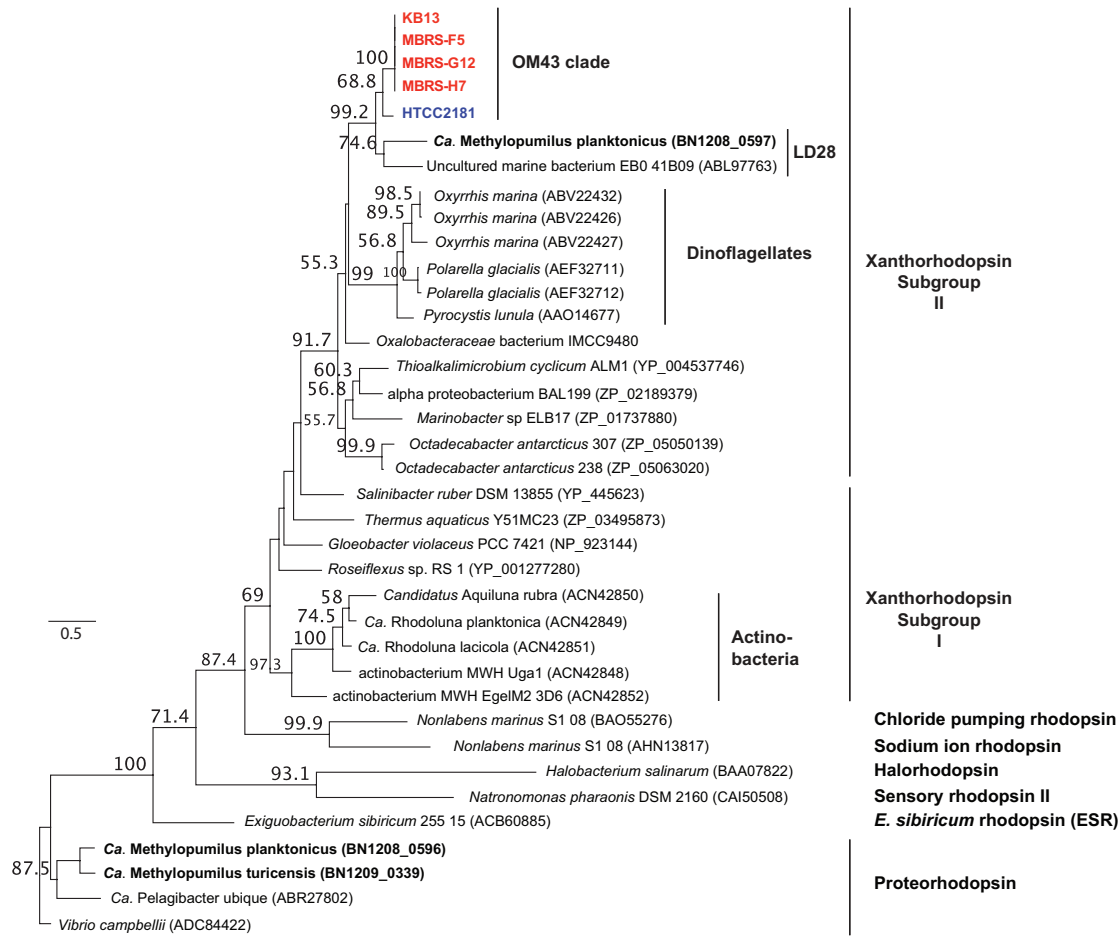

Figure S4

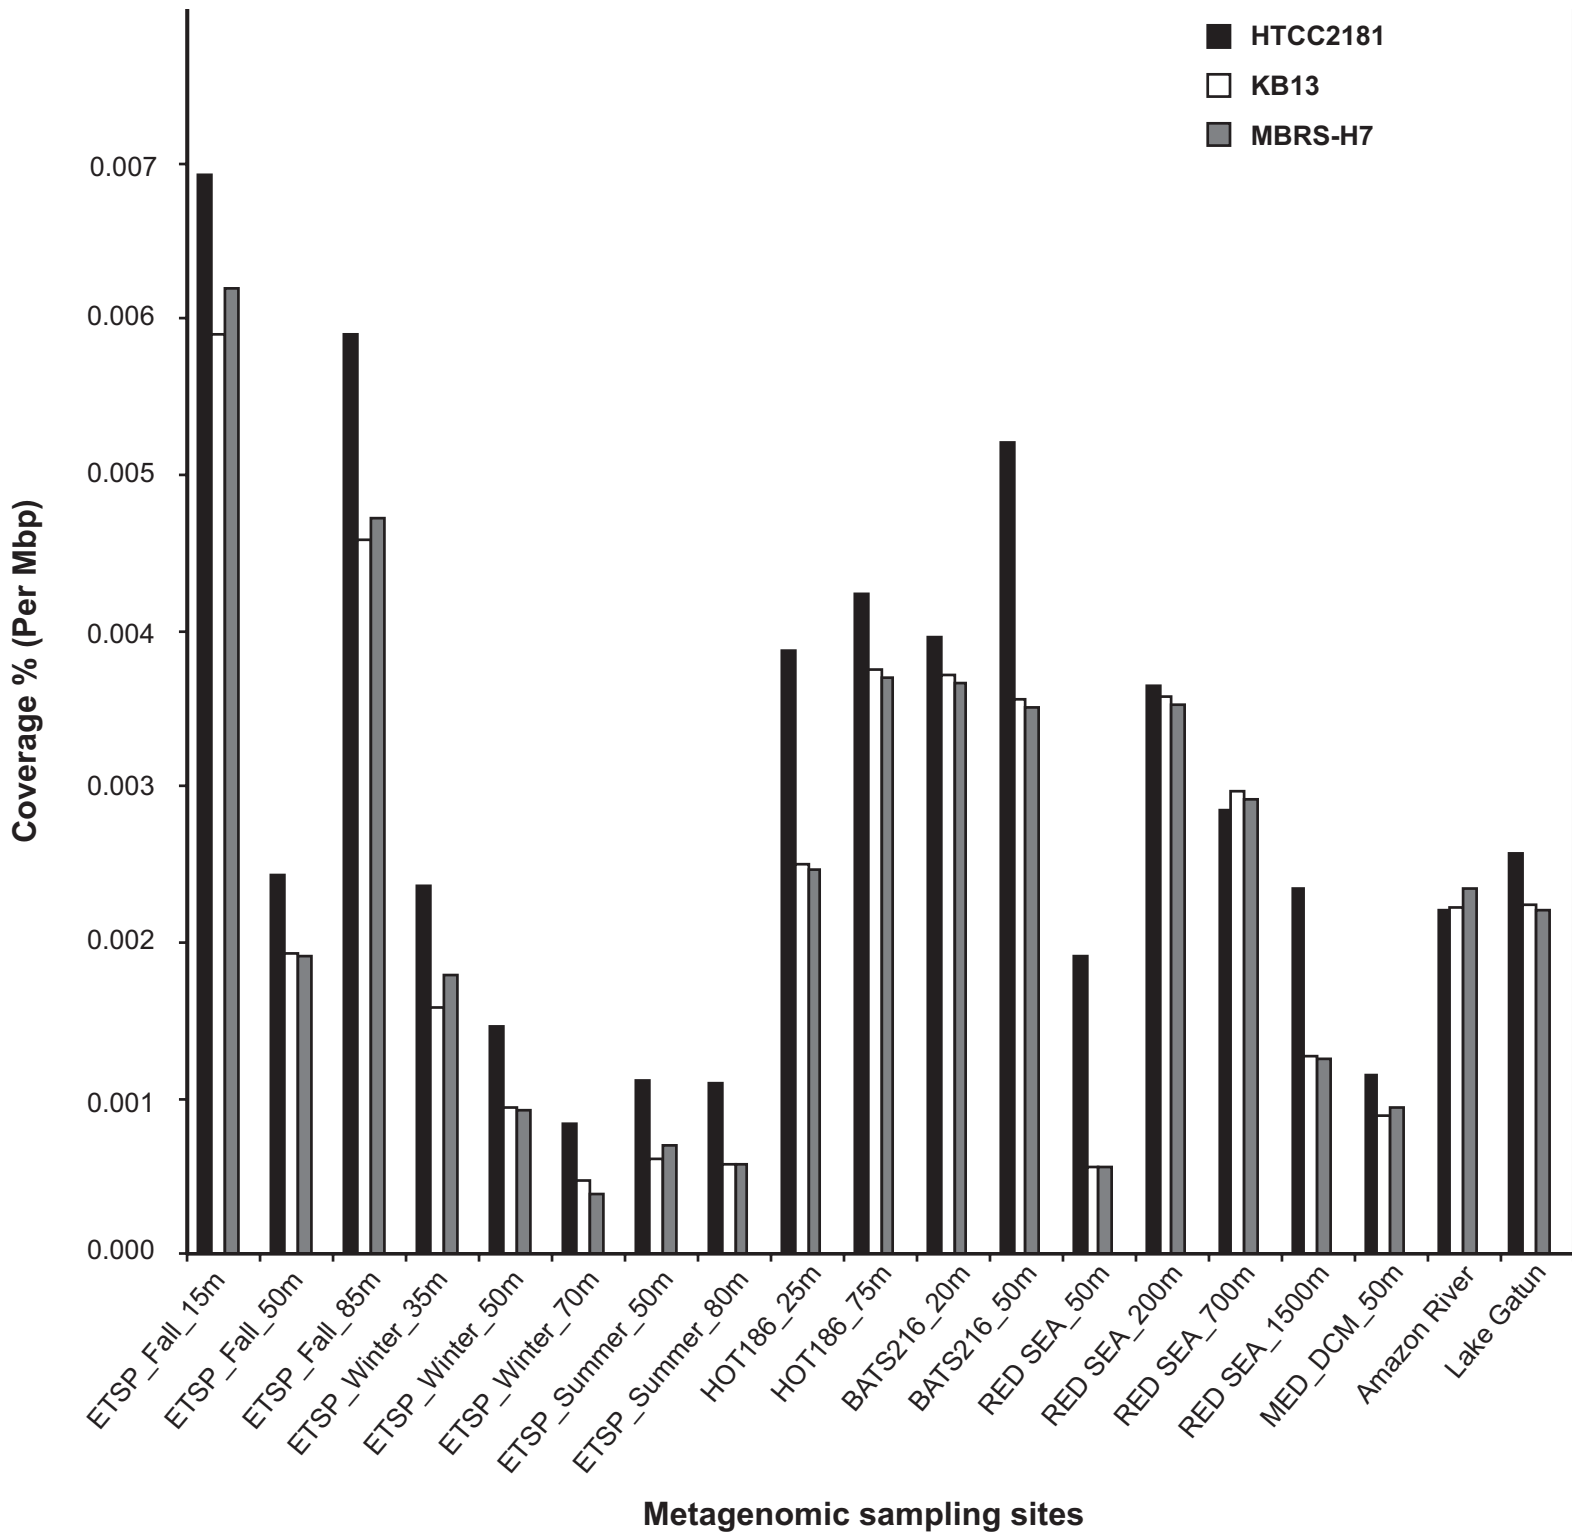

**Figure S5.**
